# Supplementary material for: Characterization of chemical composition and bacterial community of corrosion scales in different drinking water distribution systems
Source: Royal Society of Chemistry journal article supplement (doi:10.1039/c6ew00264a), 2016-11-22
Supplement: c6ew00264a1.pdf [file c6ew00264a1.pdf]

## **Supporting Information**

### **Characterization of chemical composition and bacterial community of corrosion scales in different drinking water distribution systems**

Haibo Wang,<sup>a</sup> Chun Hu,<sup>\*ab</sup> Lang Yin,<sup>a</sup> Sujia Zhang,<sup>a</sup> Lihong Liu<sup>ab</sup>

<sup>a</sup>Key Laboratory of Drinking Water Science and Technology, Research Center for  
Eco-Environmental Sciences, Chinese Academy of Sciences, Beijing, 100085, China

<sup>b</sup>University of Chinese Academy of Sciences, Beijing, 100049, China

Corresponding author:

Chun Hu

Tel: +86 10 62849628

Fax: +86 10 62923541

Email: [huchun@rcees.ac.cn](mailto:huchun@rcees.ac.cn)

*11 pages: 3 Tables, 7 Figures*

**Table S1** The value range of the main water quality parameters of different pipes from June 2013 to May 2014

| parameters                                | A           | B           | C           | D           | E           | F           | G           | H           |
|-------------------------------------------|-------------|-------------|-------------|-------------|-------------|-------------|-------------|-------------|
| pH                                        | 8.08-8.50   | 7.69-8.06   | 7.75-8.01   | 7.41-7.82   | 7.95-8.39   | 7.87-8.13   | 7.71-8.07   | 7.59-8.12   |
| NO <sub>3</sub> <sup>-</sup> -N<br>(mg/L) | 0.38-0.49   | 7.02-7.65   | 9.01-9.98   | 4.06-5.03   | 2.76-3.68   | 2.13-3.02   | 1.98-2.65   | 5.02-5.86   |
| Cl <sup>-</sup><br>(mg/L)                 | 155.3-174.8 | 23.1-28.4   | 23.9-27.4   | 24.2-29.5   | 20.8-30.8   | 30.0-40.5   | 29.3-36.7   | 45.3-51.9   |
| SO <sub>4</sub> <sup>2-</sup><br>(mg/L)   | 153.9-185.6 | 35.8-58.4   | 27.8-39.6   | 114.6-172.8 | 79.0-105.4  | 122.9-168.5 | 86.3-117.8  | 123.7-163.6 |
| Alkalinity<br>(mg CaCO <sub>3</sub> /L)   | 138.2-164.8 | 168.2-190.1 | 179.1-206.9 | 204.8-240.9 | 140.1-174.8 | 129.7-165.3 | 128.9-163.2 | 175.0-206.5 |
| chlorine residual<br>(mg/L)               | 0.22-0.35   | 0.20-0.38   | 0.21-0.38   | 0.21-0.35   | 0.20-0.50   | 0.18-0.45   | 0.25-0.40   | 0.15-0.38   |

**Table S2 The used water quality for the iron release experiment**

| Parameter (Unit)                     | Value range of<br>used water |
|--------------------------------------|------------------------------|
| pH                                   | 7.72-8.10                    |
| DO(mg/L)                             | 7.92-8.27                    |
| DOC (mg/L)                           | 1.45-1.92                    |
| NH <sub>3</sub> -N(mg/L)             | 0-0.05                       |
| NO <sub>3</sub> <sup>-</sup> (mg/L)  | 4.02-9.46                    |
| Cl <sup>-</sup> (mg/L)               | 19.8-22.3                    |
| SO <sub>4</sub> <sup>2-</sup> (mg/L) | 50.2-76.4                    |
| Alkalinity (mg CaCO <sub>3</sub> /L) | 106.2-134.4                  |
| Turbidity (NTU)                      | 0.07-0.20                    |

**Table S3** The potential corrosive bacteria at genus level

| Potential<br>corrosive<br>bacteria <sup>[1-4]</sup> | Genus             |                   |                   |
|-----------------------------------------------------|-------------------|-------------------|-------------------|
| IOB                                                 | Alicyclobacillus  | Gallionella       | Leptothrix        |
|                                                     | Pedomicrobium     | Sediminibacterium | Sideroxydans      |
|                                                     | Sphaerotilus      | Thiobacillus      |                   |
| IRB                                                 | Arthrobacter      | Bacillus          | Clostridium       |
|                                                     | Geothrix          | Geobacter         | Pseudomonas       |
|                                                     | Rhodobacter       | Shewanella        |                   |
| SOB                                                 | Acidithiobacillus | Alicyclobacillus  | Sulfuricella      |
|                                                     | Sulfuricurvum     |                   |                   |
| SRB                                                 | Desulfosporosinus | Desulfovibrio     | Desulfomicrobium  |
|                                                     | Desulfotomaculum  | Desulfobibrio     |                   |
| NRB                                                 | Acidovorax        | Aquabacterium     | Bradyrhizobium    |
|                                                     | Comamonas         | Dechloromonas     | Flavobacterium    |
|                                                     | Hyphomicrobium    | Ochrobactrum      | Ralstonia         |
|                                                     | Rhizobium         | Simplicispira     | Variovorax        |
| NOB                                                 | Nitrospira        | Nitrosospora      |                   |
| APB                                                 | Massilia          | Nocardioides      | Propionibacterium |
|                                                     | Propionivibrio    | Streptococcus     |                   |

[1] Sun, H.F., Shi, B.Y., Bai, Y.H., Wang, D.S., 2014. Bacterial community of biofilms developed under different water supply conditions in a distribution system. *Sci. Total. Environ.* 472, 99-107.

[2] Yang, F., Shi, B.Y., Bai, Y.H., Sun, H.F., Lytle, D.A., Wang, D.S., 2014. Effect of sulfate on the transformation of corrosion scale composition and bacterial community in cast iron water distribution pipes. *Water Res.* 59, 46-57.

[3] Jin, J.T., Wu, G.X., Guan, Y.T., 2015. Effect of bacterial communities on the formation of cast iron corrosion tubercles in reclaimed water. *Water Res.* 71, 207-218.

[4] Shapleigh, J.P., 2006. The Denitrifying Prokaryotes. In *The Prokaryotes*, Dworkin M, Falkow S, Rosenberg E, Schleifer K-H, Stackebrandt E. (eds) New York, USA: Springer Press, pp. 769-792.

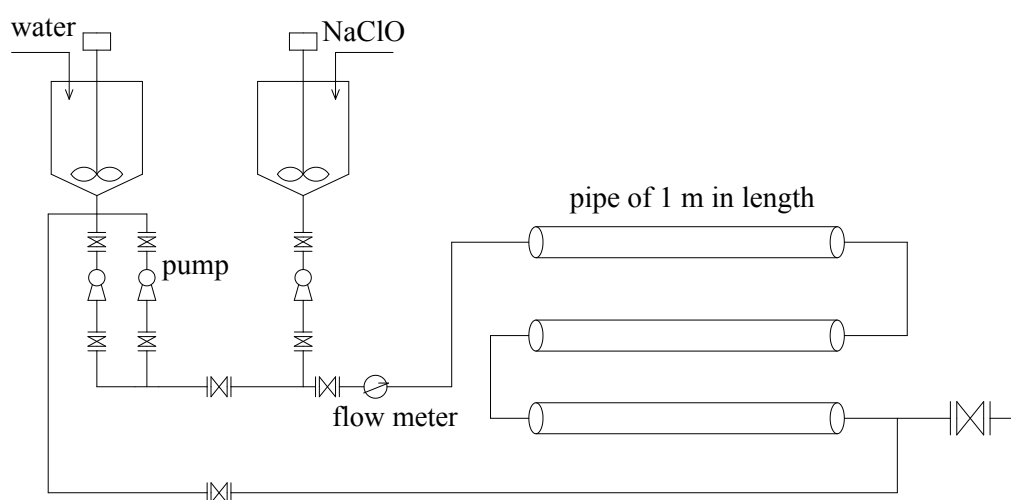

**Fig. S1** Schematic of the experimental set-up. There were two facilities in this experiment, one using the pipe A ( $1\text{ m} \times 3$ ) and the other one using pipe E ( $1\text{ m} \times 3$ ). This figure only showed one facility, and the other one was same to this one.

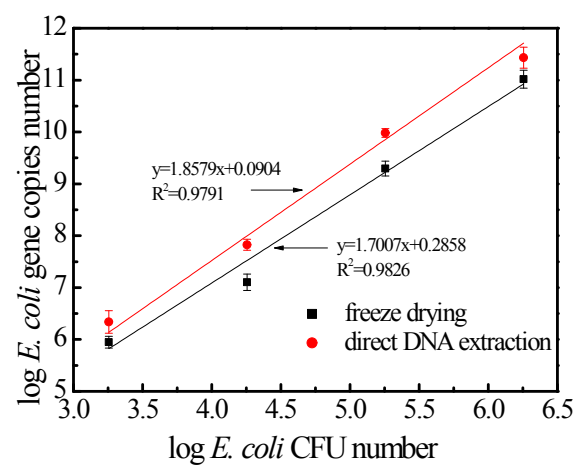

**Fig. S2** DNA recovery efficiency of freeze drying concentration method prior to DNA extraction. Linear regression was performed between gene copies numbers and CFU numbers

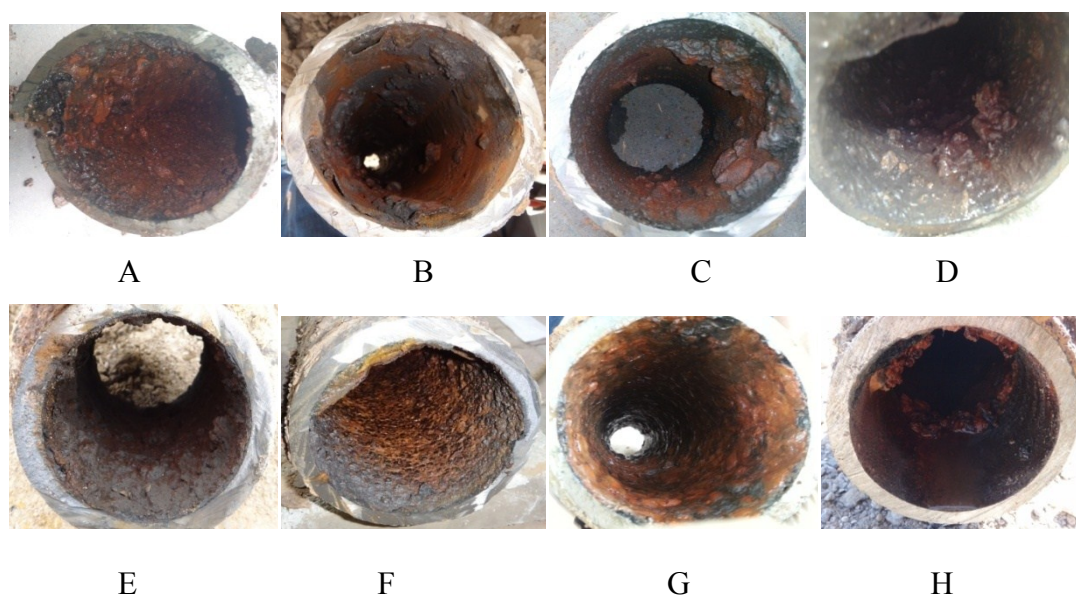

**Fig. S3** Photographs of the cut unlined cast iron pipe sections (approximately 20 years) from different cities. Pipes from cities A, B, C and D were transporting groundwater, and pipes from E, F, G and H were transporting surface water. The diameter of all pipes was 100 mm.

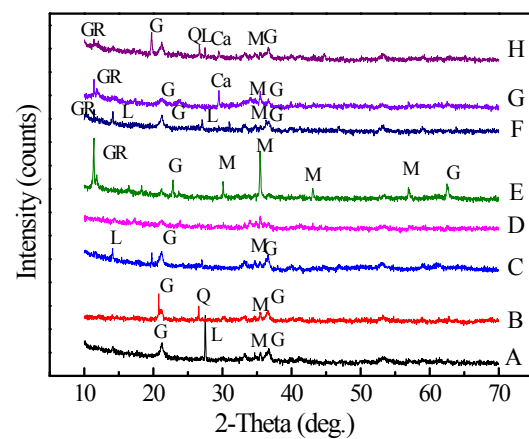

**Fig. S4** The X-ray diffraction (XRD) patterns of corrosion scales on the interior of aged unlined cast iron pipes from different cities (G-goethite, L-lepidocrocite, M-magnetite, GR–green rust, Q-quartz, Ca–calcite ).



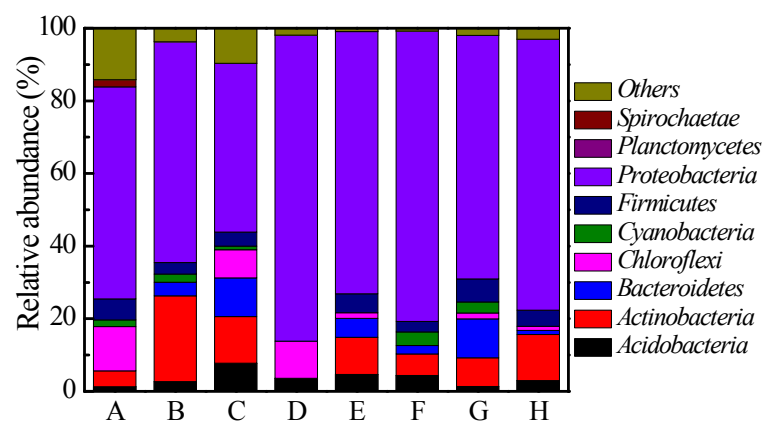

**Fig. S5** Relative abundance of bacterial phyla in corrosion scales of different pipes.

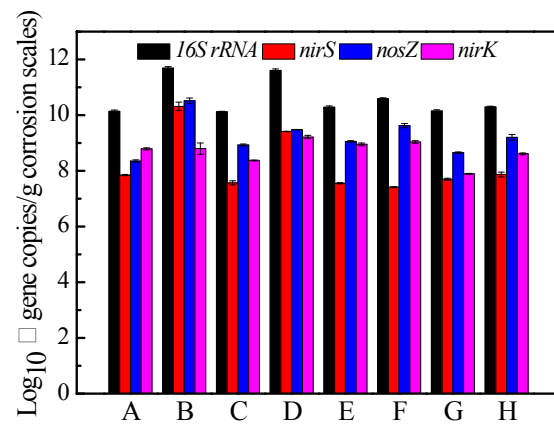

**Fig. S6** *nirK*, *nirS*, *nosZ* and 16S rRNA gene copy numbers of corrosion scales from different pipes by qPCR analysis. Error bars represent the standard deviation from the average.

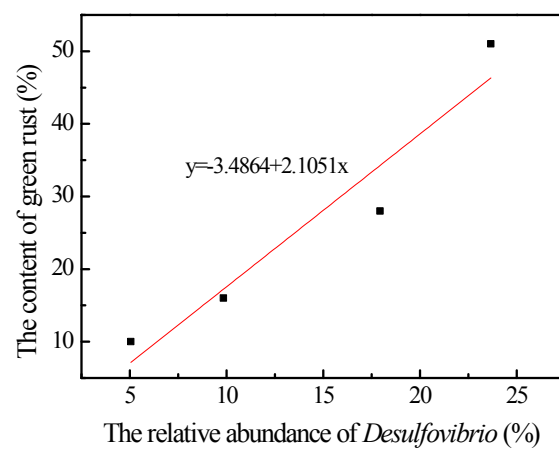

**Fig. S7** The linear correlation between the content of green rust and the relative abundance of *Desulfovibrio* in corrosion scales.
